# Supplementary material for: Circulating Exosomal miRNAs as Novel Biomarkers for Stable Coronary Artery Disease
Source: Hindawi journal article supplement (doi:10.1155/2020/3593962), 2020-01-01

## Supplementary material

**Supplementary Table 1:** Pharmacological treatments of the participants.

| <b>Medicine</b>          | <b>Control (n=20)</b> | <b>SCAD (n=20)</b> |
|--------------------------|-----------------------|--------------------|
| Aspirin                  | 0                     | 3                  |
| ACEI/ARB                 | 4                     | 3                  |
| Calcium Channel Blockers | 3                     | 0                  |
| Diuretics                | 1                     | 2                  |
| Statins                  | 0                     | 3                  |
| Hypoglycemics            | 3                     | 6                  |

ACEI: angiotensin-converting enzyme inhibitor; ARB: angiotensin receptor blocker.

**Supplementary Figure 1:** Quantification of exosomal markers in the isolated exosomes from the control and SCAD groups.

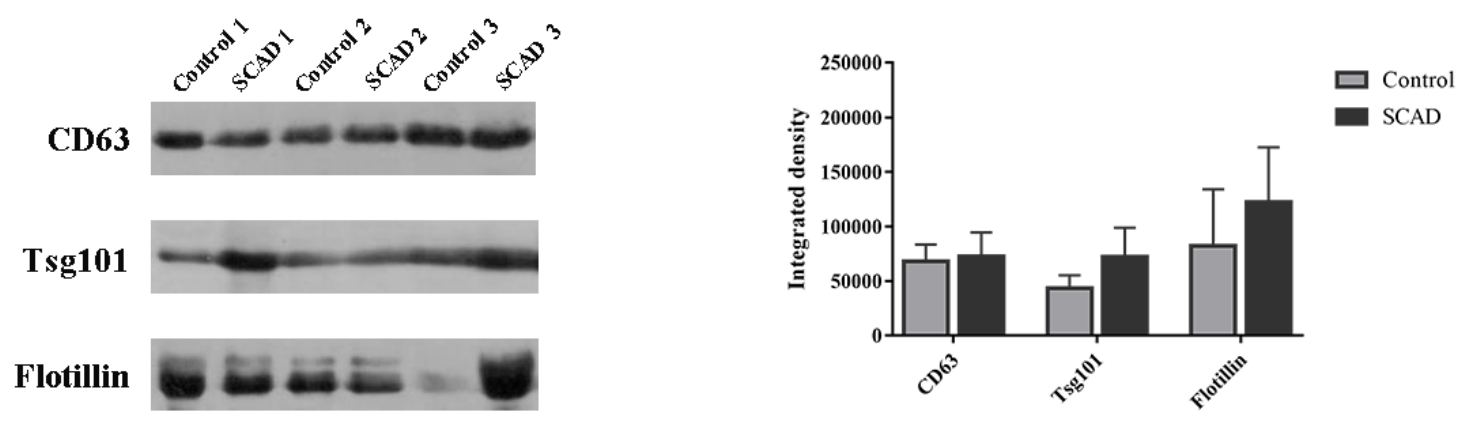

**Supplementary Figure 2: The regulatory network between the differentially expressed miRNAs and their target genes.** The blue and orange roundness represented the differentially expressed miRNAs and their target genes, respectively. The target gene number was indicated in parentheses.

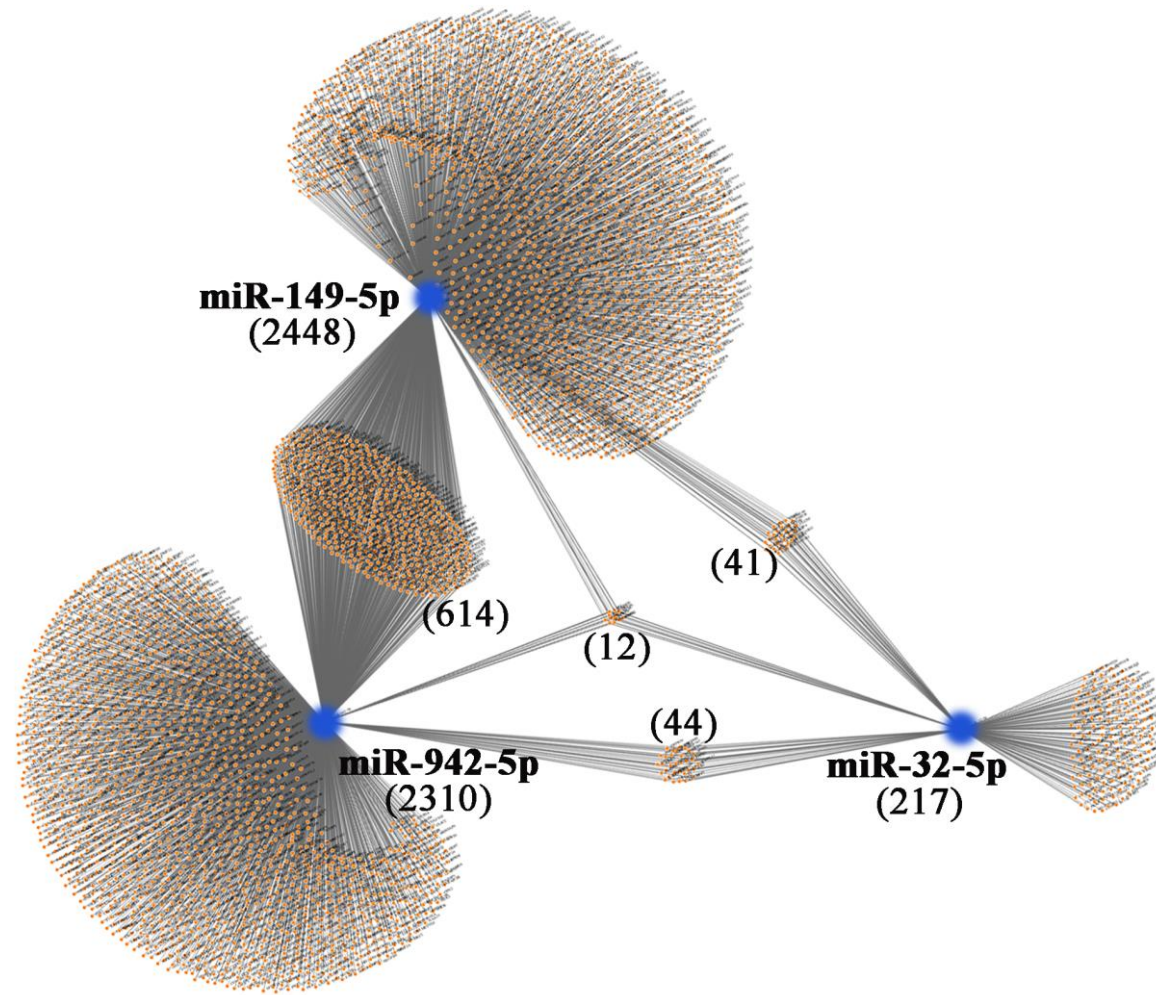

Supplement: f1 [file 3593962.f1.pdf]
